# Supplementary material for: Disease and economic burden increase with systemic lupus erythematosus severity 1 year before and after diagnosis: a real-world cohort study, United States, 2004–2015
Source: PubMed Central journal article supplement — Lupus Sci Med. 2021 Sep 14;8(1):e000503. doi: 10.1136/lupus-2021-000503 (PMC8442098; doi:10.1136/lupus-2021-000503), 2021-09-14
Supplement: lupus-2021-000503supp001.pdf [file lupus-2021-000503supp001.pdf]

**Supplementary Material:****Disease and Economic Burden Increase With Systemic Lupus Erythematosus Severity 1 Year Before and After Diagnosis: A Real-World Cohort Study, United States, 2004–2015**

Miao Jiang, PhD,<sup>1</sup> Aimee M. Near, MPH,<sup>2</sup> Barnabas Desta, MBA,<sup>1</sup> Xia Wang, PhD,<sup>1</sup>

Edward R. Hammond, MD, PhD, MPH<sup>1</sup>

<sup>1</sup>BioPharmaceuticals Medical, AstraZeneca, Gaithersburg, Maryland, United States

<sup>2</sup>IQVIA, Durham, North Carolina, United States

**Table S1. SLE-Related Medications Required Within 6 Months Before and After the Index Date**

| <b>Medication class</b> | <b>Code</b>                                    | <b>Medication description</b>                                                 |
|-------------------------|------------------------------------------------|-------------------------------------------------------------------------------|
| Azathioprine            | C9436                                          | Azathioprine, parenteral, brand name, per 100 mg                              |
|                         | J7500                                          | Azathioprine, oral, 50 mg                                                     |
|                         | J7501                                          | Azathioprine, parenteral, 100 mg                                              |
|                         | K0119                                          | Azathioprine - oral, tab, 50 mg                                               |
|                         | K0120                                          | Azathioprine - parenteral, 100 mg                                             |
| Belimumab               | J0490                                          | Injection, belimumab, 10 mg                                                   |
|                         | Q2044                                          | Injection, belimumab, 10 mg                                                   |
| Chloroquine             | J0390                                          | Injection, chloroquine hydrochloride, up to 250 mg                            |
| Corticosteroids         | J0702                                          | Injection, betamethasone acetate 3 mg and betamethasone sodium phosphate 3 mg |
|                         | J0704                                          | Injection, betamethasone sodium phosphate, per 4 mg                           |
|                         | J0810                                          | Injection, cortisone, up to 50 mg                                             |
|                         | J1020                                          | Injection, methylprednisolone acetate, 20 mg                                  |
|                         | J1030                                          | Injection, methylprednisolone acetate, 40 mg                                  |
|                         | J1040                                          | Injection, methylprednisolone acetate, 80 mg                                  |
|                         | J1094                                          | Injection, dexamethasone acetate, 1 mg                                        |
|                         | J1095                                          | Injection, dexamethasone acetate, per 8 mg                                    |
|                         | J1100                                          | Injection, dexamethasone sodium phosphate, 1 mg                               |
|                         | J1690                                          | Injection, prednisolone tebutate, up to 20 mg                                 |
| J1700                   | Injection, hydrocortisone acetate, up to 25 mg |                                                                               |

|                  |       |                                                                    |
|------------------|-------|--------------------------------------------------------------------|
|                  | J1710 | Injection, hydrocortisone sodium phosphate, up to 50 mg            |
|                  | J1720 | Injection, hydrocortisone sodium succinate, up to 100 mg           |
|                  | J2640 | Injection, prednisolone sodium phosphate, to 20 mg                 |
|                  | J2650 | Injection, prednisolone acetate, up to 1 ml                        |
|                  | J2920 | Injection, methylprednisolone sodium succinate, up to 40 mg        |
|                  | J2930 | Injection, methylprednisolone sodium succinate, up to 125 mg       |
|                  | J3300 | Injection, triamcinolone acetonide, preservative free, 1 mg        |
|                  | J3301 | Injection, triamcinolone acetonide, not otherwise specified, 10 mg |
|                  | J3302 | Injection, triamcinolone diacetate, per 5 mg                       |
|                  | J3303 | Injection, triamcinolone hexacetonide, per 5 mg                    |
|                  | J7506 | Prednisone, oral, per 5mg                                          |
|                  | J7509 | Methylprednisolone oral, per 4 mg                                  |
|                  | J7510 | Prednisolone oral, per 5 mg                                        |
|                  | J7512 | Prednisone, immediate release or delayed release, oral, 1 mg       |
|                  | J8540 | Dexamethasone, oral, 0.25 mg                                       |
|                  | S0173 | Dexamethasone, oral, 4mg                                           |
| Cyclophosphamide | C9420 | Cyclophosphamide, brand name, 100 mg                               |
|                  | C9421 | Cyclophosphamide, lyophilized, brand name, 100 mg                  |

|                       |       |                                         |
|-----------------------|-------|-----------------------------------------|
|                       | J8530 | Cyclophosphamide; oral, 25 mg           |
|                       | J9070 | Cyclophosphamide, 100 mg                |
|                       | J9080 | Cyclophosphamide, 200 mg                |
|                       | J9090 | Cyclophosphamide, 500 mg                |
|                       | J9091 | Cyclophosphamide, 1.0 gram              |
|                       | J9092 | Cyclophosphamide, 2.0 gram              |
|                       | J9093 | Cyclophosphamide, lyophilized, 100 mg   |
|                       | J9094 | Cyclophosphamide, lyophilized, 200 mg   |
|                       | J9095 | Cyclophosphamide, lyophilized, 500 mg   |
|                       | J9096 | Cyclophosphamide, lyophilized, 1.0 gram |
|                       | J9097 | Cyclophosphamide, lyophilized, 2.0 gram |
| Methotrexate          | J8610 | Methotrexate; oral, 2.5 mg              |
|                       | J9250 | Methotrexate sodium, 5 mg               |
|                       | J9260 | Methotrexate sodium, 50 mg              |
| Mycophenolate mofetil | J7517 | Mycophenolate mofetil, oral, 250 mg     |
|                       | K0412 | Mycophenolate mofetil, oral, 250 mg     |
| Rituximab             | J9310 | Injection, rituximab, 100 mg            |

**Table S2. Claims-Based Algorithm for Defining SLE Disease Severity\***

| Claims-based algorithm*                                                                                                                                                                                                                                                                                                                                                                                                                                                                                                                        | EMR adaptation                                                                                                               |
|------------------------------------------------------------------------------------------------------------------------------------------------------------------------------------------------------------------------------------------------------------------------------------------------------------------------------------------------------------------------------------------------------------------------------------------------------------------------------------------------------------------------------------------------|------------------------------------------------------------------------------------------------------------------------------|
| <b>Mild Disease</b>                                                                                                                                                                                                                                                                                                                                                                                                                                                                                                                            |                                                                                                                              |
| <ul style="list-style-type: none"> <li>• Did not meet criteria for moderate or severe disease</li> <li>• Patients who died and had less than 1 month (30 days) of enrollment in the time period (follow-up, year 1, or year 2) were classified as having died with short enrollment rather than being assigned an SLE disease severity level</li> </ul>                                                                                                                                                                                        | <ul style="list-style-type: none"> <li>• Did not meet criteria for moderate or severe disease</li> </ul>                     |
| <b>Moderate Disease</b>                                                                                                                                                                                                                                                                                                                                                                                                                                                                                                                        |                                                                                                                              |
| <ul style="list-style-type: none"> <li>• Had no filled prescriptions for cyclophosphamide or rituximab or oral corticosteroid with <math>\geq 60</math> mg/day of prednisone equivalent dose and no claims with a diagnosis of a ‘severe’ condition; AND</li> <li>• Met one or both of the following criteria at any time during the follow-up period:             <ul style="list-style-type: none"> <li>○ Had <math>\geq 1</math> nonlaboratory claim with a diagnosis of a condition listed as ‘moderate’, where the</li> </ul> </li> </ul> | <ul style="list-style-type: none"> <li>• Had <math>\geq 1</math> EMR record with a diagnosis listed as ‘moderate’</li> </ul> |

diagnosis occurs in any position  
on the claim; OR

- Had  $\geq 1$  filled prescription for an oral corticosteroid with a prednisone equivalent dose of  $\geq 7.5$  mg/day and  $< 60$  mg/day or for an immunosuppressive agent (other than cyclophosphamide)
  - Moderate conditions: acute pancreatitis, chorioretinitis, demyelinating syndrome/acute inflammatory demyelinating polyradiculoneuropathy, episcleritis/scleritis, hemolytic anemia, hepatitis (nonviral), ischemic necrosis of bone, nephritis, renal impairment other than nephritis or end-stage renal disease, lupus enteritis/colitis, mononeuropathy/polyneuropathy, myelopathy, myocarditis, pericarditis, pleurisy/pleural effusion, pseudotumor cerebri, seizure, uveitis vasculitis (excluding aortitis)
  - Moderate conditions: acute pancreatitis, chorioretinitis, demyelinating syndrome/acute inflammatory demyelinating polyradiculoneuropathy, episcleritis/scleritis, hemolytic anemia, hepatitis (nonviral), ischemic necrosis of bone, nephritis, renal impairment other than nephritis or end-stage renal disease, lupus enteritis/colitis, mononeuropathy/polyneuropathy, myelopathy, myocarditis, pericarditis, pleurisy/pleural effusion, pseudotumor cerebri, seizure, uveitis vasculitis (excluding aortitis)
-

---

**Severe Disease**

- Had  $\geq 1$  filled prescription for cyclophosphamide or rituximab or oral corticosteroid with a prednisone equivalent dose of  $\geq 60$  mg/day; OR
- Had  $\geq 1$  nonlaboratory claim with a diagnosis listed as ‘severe’, where the diagnosis occurs in any position on the claim
- Severe conditions: acute confusional state/psychosis, aortitis, arterial/venous thrombosis, aseptic meningitis, cardiac tamponade, cranial neuropathy, intestinal pseudo-obstruction, end-stage renal disease, optic neuritis, pulmonary hemorrhage, stroke/transient ischemia attack
- Had  $\geq 1$  EMR record with a diagnosis listed as ‘severe’
- Severe conditions: acute confusional state/psychosis, aortitis, arterial/venous thrombosis, aseptic meningitis, cardiac tamponade, cranial neuropathy, intestinal pseudo-obstruction, end-stage renal disease, optic neuritis, pulmonary hemorrhage, stroke/transient ischemia attack

---

EMR = electronic medical records, SLE = systemic lupus erythematosus.

\*Claim-based algorithm previously published, from Garris C, Jhingran P, Bass D, et al.

Healthcare utilization and cost of systemic lupus erythematosus in a US managed care health plan. *J Med Econ* 2013;16:667-77.

**Table S3. Medications Prescribed in the 1-Year Post-Diagnosis (Follow-up) Period for All Patients With Newly Diagnosed SLE and by SLE Disease Severity**

| Medication                | All patients<br>(N=2227) | SLE disease severity at index* |                      |                   | P-value |
|---------------------------|--------------------------|--------------------------------|----------------------|-------------------|---------|
|                           |                          | Mild<br>(n=586)                | Moderate<br>(n=1135) | Severe<br>(n=506) |         |
| Corticosteroids, n (%)    | 1695 (76.1)              | 266 (45.4)                     | 993 (87.5)           | 436 (86.2)        | <0.0001 |
| Antimalarial drugs, n (%) |                          |                                |                      |                   |         |
| Hydroxychloroquine        | 1330 (59.7)              | 373 (63.7)                     | 696 (61.3)           | 261 (51.6)        | <0.0001 |
| Chloroquine               | 9 (0.4)                  | 4 (0.7)                        | 4 (0.4)              | 1 (0.2)           | 0.4545  |
| Immunosuppressants, n (%) |                          |                                |                      |                   |         |
| Methotrexate              | 327 (14.7)               | 55 (9.4)                       | 197 (17.4)           | 75 (14.8)         | <0.0001 |
| Mycophenolate mofetil     | 145 (6.5)                | 0 (0.0)                        | 84 (7.4)             | 61 (12.1)         | <0.0001 |
| Azathioprine              | 116 (5.2)                | 0 (0.0)                        | 81 (7.1)             | 35 (6.9)          | <0.0001 |
| Cyclophosphamide          | 23 (1.0)                 | 1 (0.2)                        | 2 (0.2)              | 20 (4.0)          | <0.0001 |
| NSAIDs, n (%)             | 818 (36.7)               | 190 (32.4)                     | 454 (40.0)           | 174 (34.4)        | 0.0039  |
| Biologics, n (%)          |                          |                                |                      |                   |         |
| Belimumab                 | 32 (1.4)                 | 2 (0.3)                        | 21 (1.9)             | 9 (1.8)           | 0.0342  |
| Rituximab                 | 29 (1.3)                 | 0 (0.0)                        | 0 (0.0)              | 29 (5.7)          | <0.0001 |

NSAIDs = nonsteroidal anti-inflammatory drugs; SLE = systemic lupus erythematosus.

\*Disease severity was assessed during the 1-year period after diagnosis, and patients were classified to the most severe level during that period.



**Table S4. All-Cause Health Care Costs per Patient During the 1-Year Post-Diagnosis (Follow-up) Period by Setting of Care for All Patients With Newly Diagnosed SLE and by SLE Disease Severity**

| All-cause cost <sup>†</sup> | SLE disease severity*  |                        |                        |                        | P-value |
|-----------------------------|------------------------|------------------------|------------------------|------------------------|---------|
|                             | All patients (N=2227)  | Mild (n=586)           | Moderate (n=1135)      | Severe (n=506)         |         |
| Total cost, mean (SD)       | \$33,897<br>(\$54,013) | \$13,415<br>(\$15,707) | \$29,152<br>(\$40,466) | \$68,260<br>(\$84,713) | <0.0001 |
| By setting, mean (SD)       |                        |                        |                        |                        |         |
| Inpatient                   | \$10,252<br>(\$30,550) | \$2379<br>(\$8278)     | \$7544<br>(\$25,719)   | \$25,442<br>(\$47,217) | <0.0001 |
| Emergency department        | \$1125<br>(\$4237)     | \$418<br>(\$1320)      | \$975<br>(\$4236)      | \$2280<br>(\$5903)     | <0.0001 |
| Outpatient <sup>‡</sup>     | \$13,566<br>(\$32,747) | \$5807<br>(\$9382)     | \$11,496<br>(\$21,757) | \$27,193<br>(\$57,414) | <0.0001 |
| Office                      | \$2029<br>(\$1483)     | \$1388<br>(\$876)      | \$2009<br>(\$1378)     | \$2815<br>(\$1854)     | <0.0001 |
| Laboratory                  | \$1442<br>(\$2636)     | \$813<br>(\$1287)      | \$1332<br>(\$2151)     | \$2417<br>(\$4108)     | <0.0001 |
| Pharmacy                    | \$5484<br>(\$10,446)   | \$2609<br>(\$4371)     | \$5797<br>(\$9590)     | \$8113<br>(\$15,351)   | <0.0001 |

SD, standard deviation; SLE, systemic lupus erythematosus.

\*Disease severity was assessed during the 1-year period after diagnosis, and patients were classified to the most severe level during that period.

<sup>†</sup>2017 US dollars.

<sup>‡</sup>Outpatient services included all nonpharmacy claims not categorized as inpatient, emergency department, office, or laboratory services.
